# Supplementary material for: Marine Algae Incorporated Polylactide Acid Patch: Novel Candidate for Targeting Osteosarcoma Cells without Impairing the Osteoblastic Proliferation
Source: MDPI journal article supplement (doi:10.3390/polym13060847), 2021-03-10
Supplement: s1 [file s1]

# SUPPLEMENTARY MATERIALS

## Marine algae incorporated polylactide acid patch: Novel candidate for targeting osteosarcoma cells without impairing the osteoblastic proliferation

Salih Veziroglu,<sup>1†</sup> Mustafa Ayna,<sup>2†</sup> Theresa Kohlhaas,<sup>3†</sup> Selin Sayin,<sup>4</sup> Jacek Fiutowski,<sup>5</sup> Yogendra Kumar Mishra,<sup>5</sup> Fatih Karayürek,<sup>6</sup> Hendrik Naujokat,<sup>3</sup> Eyüp Ilker Saygili,<sup>7</sup> Yahya Açıl,<sup>3</sup> Jörg Wiltfang,<sup>3</sup> Franz Faupel,<sup>1</sup> Oral Cenk Aktas,<sup>1\*</sup> Aydin Gülses.<sup>3\*</sup>

<sup>1</sup> Chair for Multicomponent Materials, Institute for Materials Science, Faculty of Engineering, Kiel University, Kaiserstr. 2, 24143 Kiel, Germany; sve@tf.uni-kiel.de (S.V.); ff@tf.uni-kiel.de (F.F.)

<sup>2</sup> Department of Periodontology, University Hospital of Bonn, D-53111 Bonn, Germany; mayna@uni-bonn.de (M.A.)

<sup>3</sup> Department of Oral and Maxillofacial Surgery, University Hospital of Schleswig-Holstein, Campus Kiel, Arnold-Heller-Straße 3, 24105 Kiel, Germany; tete@theresakohlhaas.de (T.K.); Hendrik.Naujokat@uksh.de (H.N.); Yahya.Acil@uksh.de (Y.A.); Joerg.Wiltfang@uksh.de (J.W.)

<sup>4</sup> Marine Science and Technology Faculty, Iskenderun Technical University, 31200 Iskenderun, Turkey; selin.sayin@iste.edu.tr (S.S.)

<sup>5</sup> Mads Clausen Institute, NanoSYD, University of Southern Denmark, Alsion 2, 6400 Sønderborg, Denmark; fiutowski@mci.sdu.dk (J.F.); mishra@mci.sdu.dk (Y.K.M.)

<sup>6</sup> Department of Periodontology, Cankiri Karatekin University, 18100 Cankiri, Turkey; fatihkarayurek@karatekin.edu.tr (F.K.)

<sup>7</sup> Department of Medical Biochemistry, SANKO University, Şehitkamil, 27090 Gaziantep, Turkey; ISaygili@sanko.edu.tr (E.I.S.)

\* Correspondence: oca@tf.uni-kiel.de (O.C.A.); aguelses@mkg.uni-kiel.de (A.G.)

† These authors contributed equally.

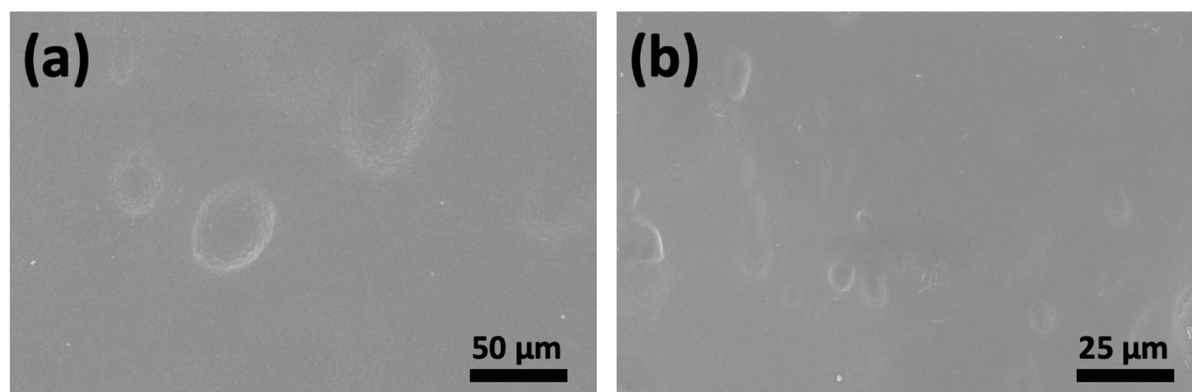

**Figure S1.** SEM images of PLA patch at different magnifications.

The FT-IR spectrum of *Sargassum vulgare* and PLA is shown in **Figure S2**. -OH stretching vibrations in the PLA structure come as a wide band of 3354 cm<sup>-1</sup>. -CH<sub>3</sub> stress vibrations were observed around 2955 cm<sup>-1</sup>, 2946 cm<sup>-1</sup>. It was observed that the absorption of C=O stretching vibrations was came at 1704 cm<sup>-1</sup>, and

C=O asymmetric bending adsorption at  $1454\text{ cm}^{-1}$ . CH and  $\text{CH}_3$  symmetric bending were  $1368, 1319\text{ cm}^{-1}$ , and the asymmetric stress vibrations of  $\text{CH}_3$  come around  $1406\text{ cm}^{-1}$ . C-O-C stress absorptions of  $1242, 1155, 1142$ , and  $1052\text{ cm}^{-1}$  were observed due to the different sequences of the C-O-C function groups. It was observed that the O-CH- $\text{CH}_3$  band absorption was  $882\text{ cm}^{-1}$  and the bending absorption of  $-\text{CH}_3$  came at  $775\text{ cm}^{-1}$ . The wide -OH absorption band coming around  $3500\text{ cm}^{-1}$ , the C=O band absorption at  $1704\text{ cm}^{-1}$ , and the bending absorption band of  $-\text{CH}_3$  at  $775\text{ cm}^{-1}$  were defined the structure of the PLA [1].

It was caused by the -OH stress vibrations in the  $3300\text{ cm}^{-1}$  wide-bandgap structure belonging to sargassum Vulgaris, which is marina algae. O-C-O symmetrical band stress vibrations in the polysaccharide ring were seen at  $1410\text{ cm}^{-1}$ . C-C-H and C-O band tensile vibrations were observed to come at  $1018$  and  $873\text{ cm}^{-1}$  [2].

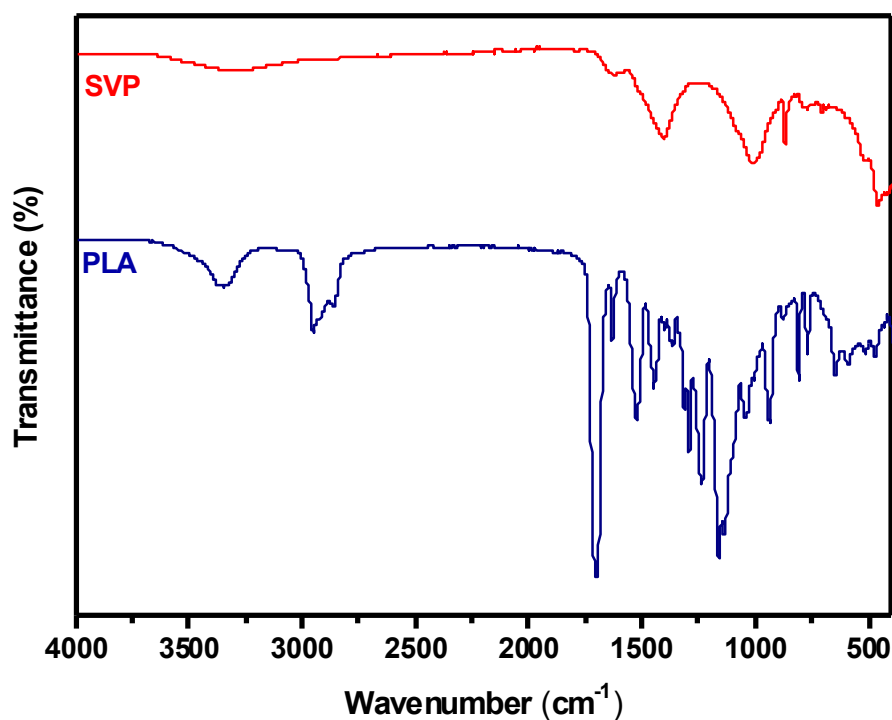

Figure S2. FTIR spectra for SVP and PLA

## References

1. Cai, Y., Lv, J. & Feng, J. Spectral Characterization of Four Kinds of Biodegradable Plastics: Poly (Lactic Acid), Poly (Butylenes Adipate-Co-Terephthalate), Poly (Hydroxybutyrate-Co-Hydroxyvalerate) and Poly (Butylenes Succinate) with FTIR and Raman Spectroscopy. J Polym Environ 21, 108–114 (2013).

2. Dalia M.S.A. Salem, Mona M. Ismail, Hermine R.Z. Tadros, Evaluation of the antibiofilm activity of three seaweed species and their biosynthesized iron oxide nanoparticles (Fe<sub>3</sub>O<sub>4</sub>-NPs), The Egyptian Journal of Aquatic Research, Volume 46, Issue 4, 2020, Pages 333-339
